# Supplementary material for: Efficacy of Motivational Interviewing to Improve Utilization of Mental Health Services Among Youths With Chronic Medical Conditions: A Cluster Randomized Clinical Trial
Source: PubMed Central journal article supplement (PMC8486984; doi:10.1001/jamanetworkopen.2021.27622), 2021-10-01
Supplement: jamanetwopen-e2127622-s001.pdf [file jamanetwopen-e2127622-s001.pdf]

1 SUPPLEMENT 1 - STUDY PROTOCOL: EFFICACY OF MOTIVATIONAL INTERVIEWING TO IMPROVE UTILIZATION OF MENTAL HEALTH  
2 SERVICES AMONG ADOLESCENTS WITH CHRONIC MEDICAL CONDITIONS: A CLUSTER-RANDOMIZED CLINICAL TRIAL  
3

4 Previous title:

5 "COACH-MI – Clinical Study on Motivational Interviewing (MI) as a tool to enhance access to mental health treatment in  
6 adolescents with chronic medical conditions and need for psychological support"

7  
8 German title: „COACH-MI – Patientenzentrierte interdisziplinäre Gesundheitsversorgung bei chronisch kranken  
9 Jugendlichen – Klinische Studie zur motivierenden Gesprächsführung“

10  
11 Acronym: COACH-MI  
12

13 Summary:

14 This study will be performed along with the implementation of screening for anxiety and depression for all adolescents  
15 (age 12-20 years) with chronic diseases treated in the outpatient clinic of the University Children’s Hospital Düsseldorf. A  
16 resulting challenge will be to refer adolescents with signs of anxiety and depression to mental healthcare. Within this  
17 setting, we designed a cluster randomized controlled trial to determine the efficacy of teaching Motivational Interviewing  
18 (MI) technique to the treating physicians, and to arrange time within the appointment framework for MI with adolescents  
19 with a conspicuous screening. The aim is to improve their utilization of mental healthcare. The focus of this study is on  
20 adolescents with chronic medical conditions presenting with symptoms of depression and anxiety but also adherence  
21 problems as measured by screening questionnaires. MI is a collaborative, evidence-based counseling technique designed  
22 to elicit intrinsic motivation and strengthen the commitment to improve a range of health behaviors. In this monocentric  
23 approach in a center with seven specialized outpatient clinics, n=1.000 patients with chronic conditions will be screened  
24 over 24 months with questionnaires for anxiety (GAD-7), depression (PHQ-9), and adherence problems (MARS-D). We  
25 expect to find at least N=162 adolescents with suspicious screening results participating in the study, which will be  
26 advised to seek psychological care. Either a physician trained in MI, who will offer an additional second appointment to  
27 talk about the screening results, or an untrained physician who performs treatment as usual (TAU) within the clinical visit  
28 will give recommendations on the day of the screening.

29 MI or TAU will be both performed by about 15-17 randomized treating physicians of the University children’s hospital in  
30 each group.  
31

32 Study details:

33 Medical research in connection with medical care  
34

35 COACH Consortium:

36 The study is part of a BMBF funded (Federal Ministry of Education and Research, Germany) healthcare project, the  
37 COACH consortium: Chronic Conditions in Adolescents: Implementation and Evaluation of Patient-centered Collaborative  
38 Healthcare.

39 Further information will be available online: <https://www.coach.klips-ulm.de/de/was-ist-coach/>  
40

41 Study design:

42 Pragmatic cluster-randomized, monocentric controlled trial, two parallel groups; Physicians of the patients will be  
43 randomized  
44

45 Study site:

46 Monocentric study at the  
47 University Children’s Hospital Düsseldorf  
48 Department of General Pediatrics, Neonatology and Pediatric Cardiology  
49 Heinrich-Heine-University Düsseldorf  
50 Moorenstr. 5, 40225 Düsseldorf, Germany  
51

52 Study team:

53 *Principal investigator (PI):*

54 Prof. Dr. med. Thomas Meissner, MD; [thomas.meissner@med.uni-duesseldorf.de](mailto:thomas.meissner@med.uni-duesseldorf.de)

55 University Children’s Hospital Düsseldorf

56 Department of General Pediatrics, Neonatology and Pediatric Cardiology

57 Heinrich-Heine- University Düsseldorf.

58 Moorenstr. 5, 40225 Düsseldorf, Germany

| Document          | Acronym  | Study registration ID      | Version                  |
|-------------------|----------|----------------------------|--------------------------|
| Study Description | COACH-MI | 2017114504 / DRKS 00014043 | 04/2018 // Addendum 2021 |

59 Study mobile phone: available after study initiation

60 Study E-mail: [coach-mi@med.uni-duesseldorf.de](mailto:coach-mi@med.uni-duesseldorf.de)

61  
62 *Study physicians:*  
63 Katharina Förtsch; [katharina.foertsch@med.uni-duesseldorf.de](mailto:katharina.foertsch@med.uni-duesseldorf.de)  
64 Dr. med. Hannah Linderskamp, MD; [hannah.linderskamp@med.uni-duesseldorf.de](mailto:hannah.linderskamp@med.uni-duesseldorf.de)  
65 Dr. med. Christina Reinauer, MD; [christina.reinauer@med.uni-duesseldorf.de](mailto:christina.reinauer@med.uni-duesseldorf.de)

66  
67 *Research assistants:*  
68 Yasemin Fidan, study nurse; [yasemin.fidan@med.uni-duesseldorf.de](mailto:yasemin.fidan@med.uni-duesseldorf.de)  
69 Rabea Viermann, research assistant; [rabea.viermann@uni-duesseldorf.de](mailto:rabea.viermann@uni-duesseldorf.de)  
70 Marina González Biber, research assistant  
71 Anna Lena Platzbecker, research assistant

72  
73 Objectives:

- 74 1. The primary outcome is the utilization of mental healthcare within six months post-intervention.  
75 2. Multiple secondary outcomes such as the number of sessions attended, disease-specific illness parameters,  
76 adherence problems, missed clinical visits, symptoms of anxiety and depression will be assessed.  
77 3. Examining possible serious adverse events (SAEs) associated with the present screening/MI approach.  
78

79 The overall goal of our project is to improve entry into mental healthcare by psychiatrists, psychologists, or  
80 psychotherapists for those adolescents in need of support. The long-term implementation of MI for adolescents with  
81 different chronic diseases might serve as a model to optimize healthcare management in daily clinical routine.  
82

83 Data collection:

84  
85 *First contact:*

86 Patients who have a scheduled appointment in the specialized outpatient clinic are informed by telephone contact about  
87 the study several days before the appointment. If they are interested to participate in the study, study information and  
88 the informed consent form are sent to the family by e-mail or regular mail. Informed consent can be given for this study  
89 at our institution and separately, if eligible, for other projects within the COACH consortium (separate informed consent  
90 forms). There will be the option for a further agreement on voice recording of the MI or TAU interview for a qualitative  
91 analysis of the conversation.  
92

93 *Patient visit:*

94 The next contact will be at the outpatient clinic of the University Children's hospital Düsseldorf right before the clinical  
95 appointment with the treating physician of the outpatient clinic. Patients and parents will be invited to join in the COACH-  
96 MI study and to discuss the study with study physicians. All patients will be asked to answer the newly established  
97 screening questionnaires for anxiety, depression, and adherence on a tablet computer. The screening will be performed  
98 once every year in all patients with chronic conditions as part of a newly implemented internal standard procedure of our  
99 institution, and participation in the study will be optional.  
100

101 If patients and parents decide to participate in the study and the informed consent form is signed, the screening can start  
102 if:

- 103 a) Both parents and the patient signed the informed consent form and security of data agreement  
104 b) The patient is  $\geq 18$  years old and has signed the informed consent form and security of data agreement  
105 c) The patient and one parent signed, and the signing parent agreed to get the consent of the second parent. The  
106 signature of one parent is sufficient to start the study if he/she asserts that participation in the study is the supposed wish  
107 of the second parent. If the second parent disagrees participation will be terminated and all data will be deleted.  
108 d) The adolescent patient (12-18 years) regularly visits the outpatient clinic alone and he signs the informed consent  
109 form. In this case, the written parental agreement has to be gained within the following two weeks. Without the parental  
110 agreement, the patient has to be excluded and his data have to be deleted. The signature of one parent is sufficient if  
111 he/she asserts that participation in the study will be the wish of the second parent. If the second parent disagrees,  
112 participation will be terminated and all data will be deleted.

113 The usual process will be to gain informed consent at least 24 hours before the clinical visit. Only, if this was not possible,  
114 informed consent on the day of the clinical visit will be accepted as an alternative approach.  
115

| Document          | Acronym  | Study registration ID      | Version                  |
|-------------------|----------|----------------------------|--------------------------|
| Study Description | COACH-MI | 2017114504 / DRKS 00014043 | 04/2018 // Addendum 2021 |

116 After completing the screening questionnaires, the Patient Health Questionnaire (PHQ-9), the 7-item Generalized Anxiety  
117 Disorder scale (GAD-7), and the adherence questionnaire (MARS-D), using a secured program on a tablet PC, immediate  
118 feedback on the results is provided to the treating physicians of the outpatient clinic (after login with a keyword). The  
119 result will be demonstrated and explained to the patient and caregivers by the treating pediatrician.

120 Results of GAD-7 and PHQ-9 will be defined as screening positive if the outcome is  $\geq 7$  points in one or both of the  
121 questionnaires. Alternatively, a positive item 9 in PHQ-9 (self-harm or suicidal ideations, score  $\geq 1$ ) defines a positive  
122 screening result. This will trigger the recommendation to seek mental healthcare. As there is no established threshold for  
123 non-adherence in the MARS-D questionnaire (Tommelein et al., 2014), the results of the MARS questionnaire will not  
124 trigger a positive screening result.

125 In cases where screening in the abovementioned questionnaires is inconspicuous but the treating physician sees a need  
126 for psychologist counseling for reasons other than anxiety, depression, or non-adherence, the treating physician can  
127 individually decide whether he recommends psychologist counseling. Physicians will be asked to document reasons for  
128 their recommendations on a report form.

129  
130 MI and TAU are both performed by the patients' treating physicians. The treating physicians in the different outpatient  
131 clinics of our institution are randomized to either MI or TAU before the study recruitment. In every outpatient clinic, there  
132 will be several physicians that either do MI or TAU.

133 MI physicians will be asked for confidentiality about MI (written informed consent) and their new way of facilitating  
134 patients' motivation to prevent contamination bias. Both groups of treating physicians will be asked to document details  
135 on their conversations and monitor whether clinical management changed over time.

136  
137 The cluster-randomization of the physicians will be performed after the informed consent of the participating physicians  
138 at the Institute of Epidemiology and Medical Biometry at the University of Ulm (p 6, 10). Physicians randomized to MI will  
139 complete a certified, two-day education course in MI prior to the study start. They will use the MI technique in the first  
140 appointment on the screening day. MI physicians will offer/recommend a second appointment within the following two  
141 weeks to talk again about motivation, the test results, and a potential need for psychological support (see below).

142 All patients with conspicuous screening results (both MI and TAU) will receive standardized written feedback on the  
143 screening visit day and direct brief advice to seek further supportive psychological counseling. This will include contact  
144 addresses of the local psychological appointment systems ("Termin Service Stelle" and "Zentrale Informationsbörse  
145 Psychotherapie (ZIP)" of the Kassenärztliche Vereinigung Nordrhein) to arrange an appointment with a psychotherapist  
146 treating adolescents within the area of Düsseldorf and internet address of a Search Engine for psychotherapist treating  
147 adolescents within the area of Düsseldorf. Moreover, it will include the telephone number of the local psychological-  
148 social care service in the SPZ "Sozialpädiatrisches Zentrum" at the University Children's Hospital.

149 Patients screened positive for anxiety or depression will have the option to contact the colleagues of another COACH  
150 subproject and to agree to participate in a study on resources and adaption (further questionnaires) or internet- and  
151 mobile-based cognitive behavioral therapy (iCBT, both needing separate informed consent), provided that the other  
152 COACH studies are ongoing and recruiting. A separate ethics vote will be obtained by the University of Ulm and Potsdam  
153 investigators and will be submitted to our Ethics Committee for agreement before this option is offered to patients.

154  
155 Disease-specific illness parameters indicating disease severity, such as HbA1c, lung function testing (FEV expected), body  
156 mass index, and other-disease related parameters (e.g., needing a wheelchair, needing oxygen) will be obtained from the  
157 medical record and included in the Case Report Form (CRF). The TAU and MI sessions (screening day and following MI  
158 visit) can be voice recorded after an optional, separate agreement of participation of patients, parents, and physicians. All  
159 physicians performing MI will complete a short questionnaire on the outcome of the interview and use of MI after each  
160 patient interview (questions will become available after MI Training, see *Addendum*, p11). We aim to ensure the correct  
161 use of MI and to evaluate whether physicians use this technique in their conversations.

162  
163 *Follow-up (six months after MI/TAU):*

164 Six months after inclusion in the study, participants will be contacted by telephone interview and/or by e-mail to  
165 participate in the follow-up re-evaluation. Patient-reported outcomes will be obtained by telephone interview and via  
166 online questionnaires, which the patient will receive as a link by e-mail. The follow-up telephone interview (or face to-  
167 face-interview as part of a regular outpatient appointment) will be performed as a semi-structured interview on  
168 healthcare utilization. This interview will gather detailed information on whether patients tried to make an appointment  
169 with a psychologist/psychotherapist/other mental health services, whether they did have appointments and how many,  
170 or what were the reasons to not seek counseling and thereby enable us to evaluate which mental health support was  
171 used.

172 Investigators will also check for AEs and SAEs that were not previously reported to the study team.

173

| Document          | Acronym  | Study registration ID      | Version                  |
|-------------------|----------|----------------------------|--------------------------|
| Study Description | COACH-MI | 2017114504 / DRKS 00014043 | 04/2018 // Addendum 2021 |

174 An annual mental health screening on anxiety and depression will be implemented as a clinical measure for all  
175 adolescents with chronic conditions, thus, all patients will be asked to join the rescreening 12 months after inclusion and  
176 will be asked for their agreement to evaluate these follow-up data as part of the study. Patients will be invited to again  
177 complete the initial mental health screening questionnaires. Questionnaires may be completed either in the outpatient  
178 department on a tablet computer (as part of a regular outpatient appointment), on paper pencil, on a tablet computer, or  
179 via online questionnaires.

180  
181 Sample Size estimation:

182 The proposed sample size for the mental health screening is estimated to be about N=1.000 in the 24 months recruitment  
183 period. The prevalence of symptoms of depression and anxiety is estimated at 20-25% in total (Quittner, Saez-Flores, &  
184 Barton, 2016). We, therefore, expect to find at least N=200 patients with conspicuous screening results. Exclusion criteria  
185 are depicted below, or some patients may decide not to participate.

186  
187 The rate of successful referrals to mental healthcare in usual care is estimated to be 10%, and we expect an increase of up  
188 to 30% in the intervention group. A Chi-square test will be applied to compare both groups. The sample size software  
189 NQuery Advanced 8.1 (Statistical Solutions, Ireland) for the two-sided chi-square test, power 80% and a significance level  
190 of 5% gives a sample size of N=62 in each group. Correcting for the cluster structure of the trial we assume a mean cluster  
191 size of 5 patients per physician. An ICC is not known. We will correct the sample size by 10% for cluster effects resulting in  
192 an estimated ICC of 2.5% and a sample size of N=69 per group. To adjust for 15% drop out (see next paragraph), a sample  
193 size for each group is estimated as N=81 treated by MI physicians or TAU physicians, summing to a total of 162 patients. A  
194 mean cluster size of 5 patients per physician results in a sample size of physicians as n=34 (2 x 17).

195  
196 Compliance / Rate of loss to follow-up:

197 About 15% were lost to follow-up after the initial screening in a comparable study (Dean, Britt, Bell, Stanley, & Collings,  
198 2016). Follow-up rates are reported in the range between 100% and 68% in the study of Van Voorhees et al. (2009) and  
199 70% for follow-up data after one year (Saulsberry et al., 2013). All cases once randomized to the study will be analyzed in  
200 an intention-to-treat analysis (ITT, Figure 1).

201  
202 To be assessed for eligibility:

203 Screening for depression, anxiety, or non-adherence:

204 Aim: N>1.000

205 To be allocated to trial: N=162

206 To be analyzed: N=162

207

| Document          | Acronym  | Study registration ID      | Version                  |
|-------------------|----------|----------------------------|--------------------------|
| Study Description | COACH-MI | 2017114504 / DRKS 00014043 | 04/2018 // Addendum 2021 |

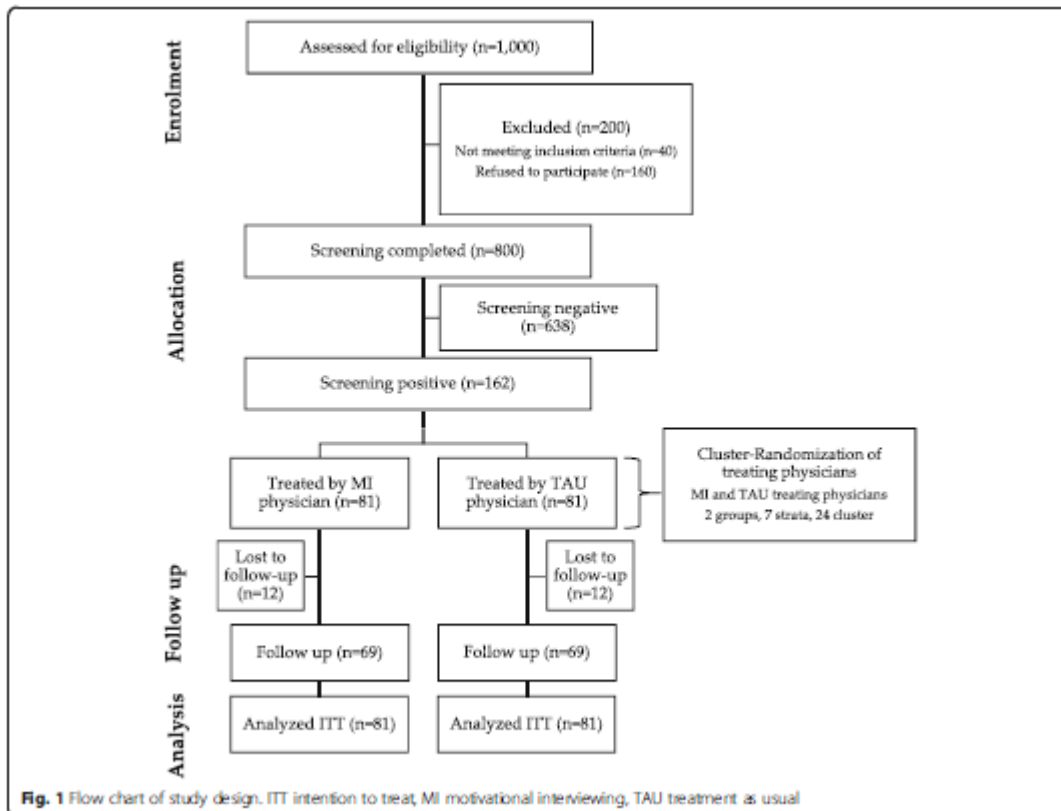

Fig. 1 Flow chart of study design. ITT intention to treat, MI motivational interviewing, TAU treatment as usual

208

209

**Figure 1:** Flow chart of study design. ITT intention to treat, MI motivational interviewing, TAU treatment as usual (from Reinauer et al., 2018)

210

211

212

Data / Statistical Analysis:

213

*Primary outcome (Follow-up):*

214

The primary outcome is the utilization of psychological healthcare, e.g., psychotherapy, psychological counseling, or iCBT, defined as making at least one appointment face-to-face or digitally within 6 months after inclusion in the study (dichotomous variable). Those patients who are on a waiting list are recorded separately. The primary outcome will be assessed via a semi-structured interview on healthcare utilization (follow-up).

215

216

217

218

219

*Secondary outcomes:*

220

The secondary outcomes are:

221

- Number of face-to-face sessions (or online intervention) with a psychologist/psychological psychotherapist/iCBT attended within the 6 month follow-up interval (as recorded in the interview)
- Changes in disease-specific illness parameters, such as HbA1c, lung function testing, body mass index, if available
- Missed clinical visits, as an additional behavioral measure for adherence (assessed by records of the hospital)
- Symptoms of anxiety (GAD-7)
- Symptoms of depression (PHQ-9)
- Self-reported adherence problems (MARS-D)
- Follow-up interview on healthcare utilization and the reasons for not claiming psychological counseling after MI or TAU
- Quantitative and qualitative analysis of MI/TAU conversations.

222

223

224

225

226

227

228

229

230

231

232

*Statistical Analysis:*

233

The analysis of the main outcome will use a logistic mixed model adjusting for the cluster structure in the data, adjusted for confounding factors, such as age and gender. The analyses will be done in the ITT population.

234

235

236

The secondary measures will be analyzed with:

237

- Non-parametric test

| Document          | Acronym  | Study registration ID      | Version                  |
|-------------------|----------|----------------------------|--------------------------|
| Study Description | COACH-MI | 2017114504 / DRKS 00014043 | 04/2018 // Addendum 2021 |

- The number of psychological face-to-face sessions or online intervention sessions attended within the 6-month follow-up interval – without 0 sessions because then the primary outcome will influence this secondary outcome.
- Missed clinical visits as a measure for adherence.
- Acceptance to participate in the study (gender comparison).
- Mixed ANOVAs
  - Symptoms of anxiety, depression, non-adherence (GAD-7, PHQ-9, MARS-D).
  - Specific illness parameters, such as HbA1c, lung function parameters, body mass index, etc., if available.
  - The safety of the treatment will be analyzed by comparing the rates of SAEs/AEs between groups by Chi-square-test or exact Fisher test (depending on the frequency).

Intervention Scheme:

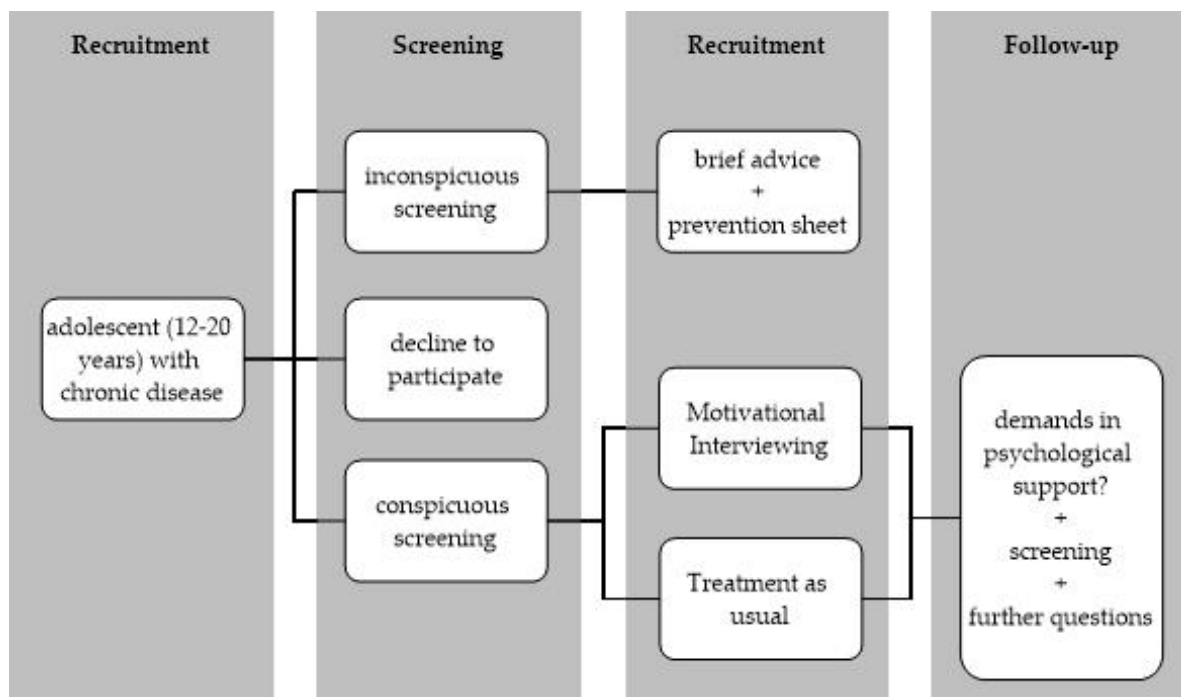

**Figure 2:** Intervention Scheme

In the recruitment phase, screening data of adolescents with chronic conditions will be obtained with screening questionnaires at the specialized outpatient departments of the University Children’s Hospital Düsseldorf. After providing their informed consent, patients complete the screening questionnaire on a tablet computer (Figure 2) The study makes use of the screening tool, which is programmed to give an immediate evaluation (after login of the treating physician). Screening includes the Generalized Anxiety Disorder 7-item scale (GAD-7; Spitzer, Kroenke, Williams, and Löwe (2006)), the depression part of Patient Health Questionnaire (PHQ-9; Kroenke, Spitzer, and Williams (2001)) and questions on adherence to therapy (MARS-D). Either a GAD-7 or PHQ-9 score  $\geq 7$  will be defined as an indication of the need for supportive counseling.

Those patients with inconspicuous screening results will be reassured that there is good adaption and get brief advice that there is currently no need for psychological care. They will receive a psychoeducational handout about helpful resources and about coping with chronic conditions.

Patients with positive screening results will constitute the intervention group. Their treating physicians were previously randomized to MI or TAU. Depending on the physician’s training status, patients are allocated to the MI or TAU group. Patients with conspicuous screening results will be advised by an MI-trained physician or a TAU physician (depending on his/her randomization) to consult a psychologist or psychotherapist.

Physicians advise screening-positive patients to seek psychological support: Patients with both MI or TAU get a written recommendation - an information sheet about therapeutic options: Psychotherapists at the on-site social pediatric center (SPZ) or seeing a psychotherapist practitioner, psychiatrist, or clinical psychologist.

| Document          | Acronym  | Study registration ID      | Version                  |
|-------------------|----------|----------------------------|--------------------------|
| Study Description | COACH-MI | 2017114504 / DRKS 00014043 | 04/2018 // Addendum 2021 |

274  
 275 “MI patients” receive an immediate extensive talk and advice (MI technique), and a second MI session within two weeks  
 276 is recommended. This optional, offered second appointment should be regularly scheduled to be a second face-to-face  
 277 visit in the outpatient clinic, and only if not accepted by the patient in exceptional cases an alternative telephone session  
 278 with the treating physician will be offered.  
 279 The control condition is immediate brief advice which represents TAU on the screening day visit. The topic and length of  
 280 this advice will be not defined or structured and should represent the usual care of the attending physician. To describe  
 281 TAU, usual care visits will be documented by physicians (length, topics) and can be audio recorded to examine the extent  
 282 of natural/spontaneous MI communication strategies used in the control condition.  
 283  
 284 Six months after study inclusion the patients will be interviewed about their mental healthcare utilization at follow-up.  
 285 The primary outcome is the successful uptake of a mental healthcare intervention within the 6-month follow-up interval.  
 286 A reassessment of secondary outcomes will be performed at follow-up and annual rescreening. Longitudinal clinical data  
 287 will be obtained at the most recent regular visit.  
 288

289 Intervention training: Education of physicians in MI

290 The intervention is to establish a Motivational interviewing (MI) training to enable physicians to deliver an MI-based ultra-  
 291 short intervention aiming at patients’ motivation towards claiming mental healthcare by psychiatrists, clinical  
 292 psychologists, or psychotherapists.  
 293 MI and TAU are both performed by the treating physician of the patients in the outpatient clinic setting. There are  
 294 different outpatient clinics at our institution involved.  
 295 Physicians will be cluster-randomized to either MI or TAU before the study, using the Minimization procedure of Pocock  
 296 and Simon (Pocock and Simon, 1975) using the randomization software RITA, Version 1.31 (RITA (Randomization In  
 297 Treatment Arms), 2013). As prognostic factors/strata, the medical specialization of the physicians and the expected  
 298 cluster size (small, big) will be considered. A mean number of about 5 patients per physician is assumed. The  
 299 randomization will be performed with the informed consent of the participating physicians in an independent institution  
 300 (Institute of Epidemiology and Medical Biometry at the University of Ulm).  
 301 Physicians will be trained in MI in a two-day workshop by an experienced, certified psychologist from the “Motivational  
 302 Interviewing Network of Trainer” (MINT) organization (GK Quest Akademie, Heidelberg). The training consists of basic  
 303 information about MI, practical aspects, practical training, and an elaboration of a checklist for the following MI in the  
 304 study. This checklist, Motivational Interviewing Treatment Integrity (MITI) can be implemented to ensure that the  
 305 physicians make use of important aspects of MI during the interview.  
 306 The practical training includes videotaping of a “training proband” following discussion with an expert. Additional  
 307 telephone supervision of MI can be utilized with an expert from GK Quest Akademie GmbH. A study from Miller, Yahne,  
 308 Moyers, Martinez, and Pirritano (2004) demonstrated, that clinicians can be successfully trained in a two-day course in  
 309 MI. Refreshment group training will be organized within the study period of 24 months.  
 310

311 Addendum:

312 *The two-day MI workshop was conducted with a focus on chronic conditions, anxiety, and depression symptoms and on*  
 313 *how to improve the use of mental healthcare services. Topics included theoretical definition and core principles of MI and*  
 314 *skill practice, focusing on stages of change, empathy, MI spirit, exploration of ambivalence, rolling with resistance, change*  
 315 *talk, and confidence talk. Participants worked on a brief guide for their MI consultations after anxiety and depression*  
 316 *screening. Participants were provided a pocket guide on MI-consistent conversation techniques, e.g., open-ended*  
 317 *questions, reflective listening, affirmations, advice with permission, creating collaboration, and emphasizing*  
 318 *autonomy/control. , a flowchart for the conversation structure and helpful phrases in the context of CMCs. The course*  
 319 *contained supervised, practical exercises for a focused MI intervention, aiming to improve access to mental healthcare in*  
 320 *adolescents.*  
 321

322 To achieve a high external validity, we will try to include all patients from the outpatient department of the University  
 323 children’s hospital fulfilling the inclusion criteria and randomize all the physicians who take care of these patients after  
 324 they gave informed consent to randomization. We aim at improving the acceptance of psychological support. We  
 325 consider it most reasonable to teach the treating physicians who regularly see the patients with chronic conditions in the  
 326 outpatient clinic. They are the familiar healthcare professionals and thus the gatekeepers towards mental healthcare  
 327 offers. An alternative model including a psychologist or external counselor for the delivery of MI would not represent  
 328 usual clinical practice and limits acceptance, future dissemination, and implementation. By training the treating  
 329 physicians in MI we also expect to establish sustainable effects towards better skills of physicians in patient-centered  
 330 communication with their adolescent patients.  
 331

| Document          | Acronym  | Study registration ID      | Version                  |
|-------------------|----------|----------------------------|--------------------------|
| Study Description | COACH-MI | 2017114504 / DRKS 00014043 | 04/2018 // Addendum 2021 |

332  
333  
334  
335  
336  
337  
338  
339  
340  
341  
342  
343  
344  
345

**Controls:**

We decided to use TAU as the comparator. Physicians randomized to TAU are not trained in MI and are asked to give standard advice on the screening results, including the recommendation to consult psychological care. TAU will be captured by a standardized physician report to allow for a description of TAU (length, content, topics, etc.).

**Trial Duration:**

Time for preparation of the trial (months): 6 months  
 Recruitment period (months): 24 months  
 First subject / patient in to last subject / patient out (months): 36 months  
 Time for data clearance and analysis (months): 9 months  
 Duration of the entire trial (months): 48 months  
 Expected start of recruitment: April 2018

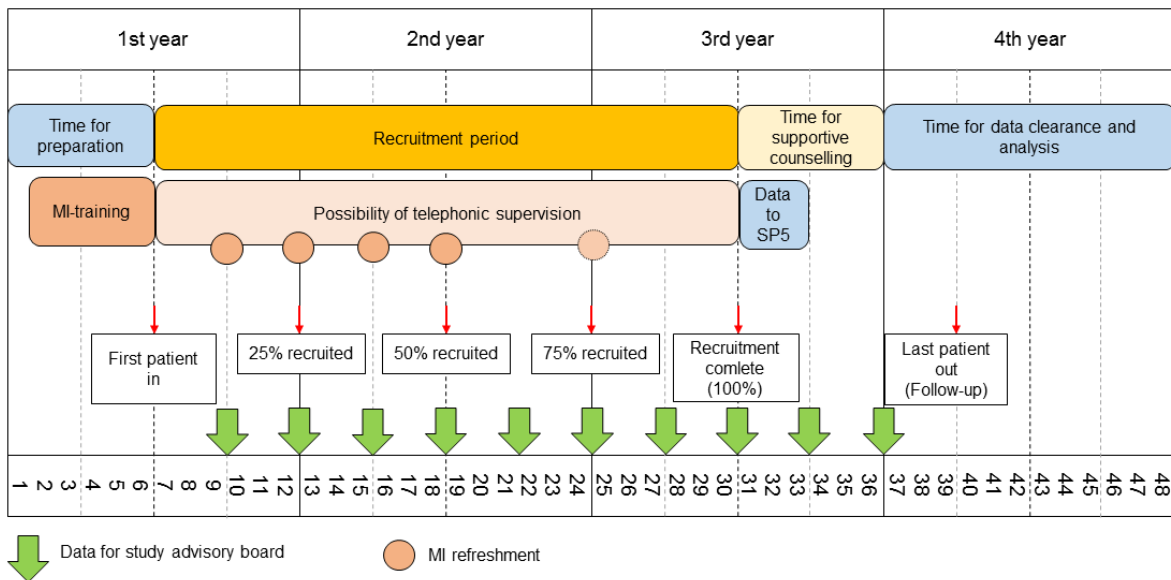

**Figure 2: Trial flow**

**Target Population and Inclusion / Exclusion Criteria:**

Inclusion criteria: Age 12-20 years; chronic medical condition. Chronic medical conditions are defined as diseases that have one or more of the following characteristics: duration of condition > 1 year, causing significant impairment of daily routine, need for continuous care, and/or medical treatment.

This will include the following diseases: Asthma, allergy, cystic fibrosis, diabetes, endocrine disorders (adrenal insufficiency, growth hormone deficiency, thyroid disorders, metabolic syndrome), neurological diseases (epilepsy, multiple sclerosis, migraine, cerebral palsy, condition after stroke, brain tumors, hydrocephalus), chromosomal disorders (trisomy), heart disease (congenital heart disease, cardiomyopathy, arrhythmia, hypertension), inborn errors of metabolism (phenylketonuria, glycogen storage disease, organic acid disorders, galactosemia, severe hyperlipidemia, congenital hyperinsulinism), chronic inflammatory bowel disease, celiac disease, chronic abdominal pain, hepatopathy, short bowel syndrome, arthritis, lupus, autoinflammatory diseases, HIV, Aids.

Exclusion criteria: Current psychotherapy, psychosis, acute suicidality, severe cognitive deficit, communication/language problems.

**Ethical Considerations/Good Clinical Practice:**

The study will be performed following the principles of Good Clinical Practice (GCP), with the Helsinki protocol, and with all current ethical standards. The study protocol will be approved by the Ethics Committee of the University of Düsseldorf (COACH-MI study). This will include the formal informed consent procedures with the caregivers/legal guardians of adolescent patients, and informed consent from the patients 18-20 years old as described above. The participants will be informed that they can leave the respective study at any time without any disadvantages for their medical care.

Research participants will get easier access to mental healthcare screening and discussion of this screening with the physician compared to usual care. Results of screening measures will be reported to the patients and their caregivers. The intervention (education of the treating physician in MI to improve entry into mental healthcare use) is considered safe.

| Document          | Acronym  | Study registration ID      | Version                  |
|-------------------|----------|----------------------------|--------------------------|
| Study Description | COACH-MI | 2017114504 / DRKS 00014043 | 04/2018 // Addendum 2021 |



373  
374  
375  
376  
377  
378  
379  
380  
381  
382  
383  
384  
385  
386  
387  
388  
389  
390  
391  
392  
393  
394  
395  
396  
397  
398  
399  
400  
401  
402  
403  
404  
405  
406  
407  
408  
409  
410  
411  
412  
413  
414  
415  
416  
417  
418  
419  
420  
421  
422  
423  
424  
425  
426  
427  
428  
429

A standard procedure to respond to suicidal ideations or suicidal behaviors of study participants will be integrated into the teaching of study physicians and treating physicians before the study start. If physicians suspect suicidality during the study, they are advised to use the Columbia Suicide Severity Rating Scale (C-SSRS, <http://www.cssrs.columbia.edu>) as a standard tool for the evaluation of suicidality. Alternatively, they can immediately include the in-house psychological team on the same day for evaluation of suicidality. If there is substantiated concern of suicidality, the patient will be transferred to the local psychiatry center for evaluation.

Data safety will be assured following the German data protection regulations.

Since the intervention of this study is one or two low-intensity MI sessions provided by MI-trained physicians, we do not expect any SAEs concerning the intervention condition. However, the implementation of a yearly screening for anxiety and depression and the evaluation of adherence problems, and a resulting recommendation to seek psychological care might have negative effects on patient well-being. Potential specific AEs/SAEs are related to unmasking dormant conflicts: worsening of anxiety, depression, and/or adherence with the resulting need of admission to the hospital. Therefore, we will record and analyze the occurrence of AEs/SAEs next to the data mentioned during the study and at follow-up (six months after MI/TAU).

As soon as SAEs get to the knowledge of the investigators, they will be reported within 24 hours to the PI in Düsseldorf (Prof. Meissner or substitute) and the study team of the University of Ulm (Prof. Baumeister or substitute) who will assess the relation to study intervention and directly inform the DSMB (related) or include the SAE in the regular reports to the DSMB (unrelated).

**Benefit-risk balance:**

A mental health screening of adolescents with chronic disease is not regularly implemented today. Such screening is regarded as an important improvement of current clinical practice to help identify those patients with a need for additional psychological support in the difficult phase of adolescence. Anxiety and depression may lead to non-adherence, harmful behavior, and insufficient treatment in the affected adolescents.

Education of physicians in MI has also to be regarded as an improvement of physicians' skills for the benefit of the patients. Both measures are considered safe without major risk for study participants. Even if screening may trigger a temporary deterioration by unmasking dormant conflicts, we do believe that detecting depression and anxiety in adolescents with chronic conditions is an important measure to ensure good care and treatment.

The most likely safety concern for the patients might be that former unknown suicidality or severe depression is uncovered by the screening testing or the following advice (TAU/MI).

**Insurance:**

In cases where a second appointment is scheduled for MI, travel accident insurance for the participants and their caregivers for going to and from the site is provided (Marsh Medical consulting).

**Quality Assurance, Safety, Data Protection and maintenance of Medical Confidentiality**

Mental health screenings will be generally implemented with an internal Standard Operating Procedure (SOP) at the Children's Hospital, guiding clinicians on how to screen adolescents with chronic disease. Recruitment of suitable patients will be carried out with the assistance of the study team. Established and validated questionnaires will be used.

MI education of the physicians by certified trainers will be performed with a specialized institute (GK Quest Akademie) with experience in teaching MI (MI Network of Trainers, MINT). MINT is an international organization, with the overall aim to ensure and improve the implementation and quality of MI. Evaluation of MI competence can be analyzed with an established coding system for MI (MITI 4.2; German version, Motivational Interviewing Treatment Integrity check). Furthermore, during the study period, additional telephone counseling and supervision are offered. After the basic training regular "booster-teaching" will be offered.

**Addendum:**

*Conversation length and semiquantitative use of MI-consistent techniques are self-reported by the physicians after each consultation in a short written questionnaire. MI physicians report their semi-quantitative use of six basic MI techniques: advice with permission, open-ended questions, reflective listening, affirmations, creating collaboration, and emphasizing autonomy/control; from 0=not used to 2=often used, for a maximum score of 12 points.*

The Department of Clinical Psychology and Psychotherapy, Institute of Psychology and Education, University of Ulm, and the Institute of Epidemiology and Medical Biometry at the University of Ulm will provide methodical trial support,

| Document          | Acronym  | Study registration ID      | Version                  |
|-------------------|----------|----------------------------|--------------------------|
| Study Description | COACH-MI | 2017114504 / DRKS 00014043 | 04/2018 // Addendum 2021 |

430 including independent randomization of participating physicians, data management, collecting reports for the DSMB and  
431 statistical expertise in the evaluation of study data as follows:

- 432
- 433 1. All data of the electronic screening process (pseudonymized questionnaires) will be stored on the local server of the  
434 University of Düsseldorf or if this will not be possible on a secured German server, fulfilling the current data safety  
435 regulations in Germany. Patient-related data are deposited on a protected local database on the server of the  
436 University of Düsseldorf in pseudonymized form. Informed consent forms (written, signed, and dated) and case  
437 report forms are locally stored in hardcopy in the investigator site file (ISF) for each patient with limited access to  
438 ensure confidentiality and security. Access to the study files will be limited to the study physicians. Anonymized data  
439 reports may be sent to the University of Ulm for statistical evaluation, using appropriate data protection measures  
440 which will be consented to with data protection experts from the COACH consortium at the University of Ulm (Prof.  
441 H. Baumeister, Department of Clinical Psychology and Psychotherapy, Institute of Psychology and Education,  
442 University of Ulm and Prof. R. Holl, Institute of Epidemiology and Medical Biometry at the University of Ulm). An  
443 ethics vote of the University of Ulm will be obtained before study data transfer and sent to the Research Ethics  
444 Committee of the University of Düsseldorf for evaluation.
  - 445 2. Data of primary and secondary outcome parameters will be obtained during initial and following clinical visits or by  
446 follow-up telephone interview and will be stored in pseudonymized form locally in Düsseldorf and transferred to the  
447 coordinating study center at the University of Ulm as described above.
  - 448 3. An independent Data Safety and Monitoring Board will support the investigators during the study. The coordinating  
449 center will collect and forward reports for the intervention studies of the consortium for the scheduled scientific  
450 advisory board meetings.
  - 451 4. For GCP conformity SAEs will be reported within 24 hours to the PI in Düsseldorf (Prof. Dr. Meissner or substitute)  
452 and the central coordinating study team of the University of Ulm (Prof. Dr. Baumeister or substitute). Both  
453 institutions will assess whether the SAE is “clearly related” to the intervention (MI), “maybe related” or “unrelated”.  
454 The DSMB will be immediately informed about related/maybe related SAEs and decide on continuation,  
455 modification, or stop of study.

456  
457 Data Safety and Monitoring Board (DSMB):

458 A Data Safety and Monitoring Board (DSMB) for the COACH consortium with independent experts from Pediatrics and  
459 Psychology will oversee the study. Quarterly progress will be reported to the DSMB. DSMB members will evaluate the  
460 progress and safety of the study and decide about continuation or modification.

461  
462 Questionnaires:

463 *Generalized Anxiety Disorder Screener (GAD-7):* The Generalized Anxiety Disorder Screener is a practical self-report  
464 anxiety questionnaire that consists of 7 items and describes the most prominent diagnostic features of the DSM-V  
465 diagnostic criteria A, B, and C for generalized anxiety disorder. The 7 core symptoms of generalized anxiety disorder can  
466 be scored from 0 = “not at all” to 3 = “more than half the days” during the last two weeks. The GAD-7 scores range from 0  
467 to 21 and the cut-off points of 5, 10, and 15 represent the thresholds for mild, moderate, and severe anxiety symptom  
468 levels, respectively (Löwe et al., 2008). For the GAD-7, good internal consistency is reported with Cronbach’s  $\alpha$  .79 and .91  
469 (Dear et al., 2011). For the current study, a cut-off of  $\geq 7$  will be used as a qualifier for inclusion in the study.

470  
471 *Patient Health Questionnaire (PHQ-9):* The PHQ-9 (Kroenke & Spitzer, 2002) is a 9-item depression module from the full  
472 Patient Health Questionnaire that can be entirely self-administered by the patient. In the PHQ-9, each of the 9 DSM-V  
473 criteria can be scored from 0 = “not at all” to 3 = “nearly every day”. The range of the sum-scores is from 0 to 27 and the  
474 cut-off points of 5, 10, 15, and 20 represent the thresholds for mild, moderate, moderately severe, and severe  
475 depression, respectively (Kroenke & Spitzer, 2002; Kroenke et al., 2001). For the PHQ-9, internal reliability estimates  
476 range from .86 to .89 using Cronbach’s  $\alpha$ . Two-day test-retest reliability is estimated to be .84 with nearly identical mean  
477 total scores (Kroenke et al., 2001). For the current study, a cut-off of  $\geq 7$  will be used as a qualifier for inclusion in the MI  
478 study.

479  
480 *Medication Adherence Rating Scale (MARS-D):* The Medication Adherence Rating Scale is a five items questionnaire  
481 assessing adherence to medical treatment (Mahler et al., 2010; Thompson et al., 2000). Five questions ask about both  
482 intentional and unintentional nonadherence, items are Likert scale ranging from 1 to 5 resulting in a total score between  
483 5 and 25, (Mahler et al., 2010; Thompson et al., 2000), 25 points resemble adherence, if patients score lower, the  
484 pathological items will be displayed to the treating physician to consider together with the patients whether non-  
485 adherence jeopardizes health.

| Document          | Acronym  | Study registration ID      | Version                  |
|-------------------|----------|----------------------------|--------------------------|
| Study Description | COACH-MI | 2017114504 / DRKS 00014043 | 04/2018 // Addendum 2021 |

486 References:  
487 Dean, S., Britt, E., Bell, E., Stanley, J., & Collings, S. (2016). Motivational interviewing to enhance adolescent mental health  
488 treatment engagement: a randomized clinical trial. *Psychological Medicine*, 46(09), 1961-1969.  
489 Dear, B. F., Titov, N., Sunderland, M., McMillan, D., Anderson, T., Lorian, C., & Robinson, E. (2011). Psychometric  
490 comparison of the generalized anxiety disorder scale-7 and the Penn State Worry Questionnaire for measuring response  
491 during treatment of generalised anxiety disorder. *Cognitive behaviour therapy*, 40(3), 216-227.  
492 Horne R., Weinman J. Self-regulation and self-management in asthma: exploring the role of illness perceptions and  
493 treatment beliefs in explaining non-adherence to preventer medication. *Psychol Health*.2002;17(1):17–32.24.  
494 Kroenke, K., & Spitzer, R. L. (2002). The PHQ-9: a new depression diagnostic and severity measure. *Psychiatric annals*,  
495 32(9), 509-515.  
496 Kroenke, K., Spitzer, R. L., & Williams, J. B. (2001). The Phq-9. *Journal of general internal medicine*, 16(9), 606-613.  
497 Löwe, B., Decker, O., Müller, S., Brähler, E., Schellberg, D., Herzog, W., & Herzberg, P. Y. (2008). Validation and  
498 standardization of the Generalized Anxiety Disorder Screener (GAD-7) in the general population. *Medical care*, 46(3), 266-  
499 274.  
500 Mahler, C., Hermann, K., Horne, R., Ludt, S., Haefeli, W. E., Szecsenyi, J., & Jank, S. (2010). Assessing reported adherence  
501 to pharmacological treatment recommendations. Translation and evaluation of the Medication Adherence Report Scale  
502 (MARS) in Germany. *Journal of evaluation in clinical practice*, 16(3), 574-579.  
503 Miller, W., Yahne, C., Moyers, T., Martinez, J., & Pirritano, M. (2004). A Randomized Trial of Methods to Help Clinicians  
504 Learn Motivational Interviewing. *Journal of consulting and clinical psychology*, 72(6), 1050-1062.  
505 Pocock, S. J., Simon, R. (1975): Sequential treatment assignment with balancing for prognostic  
506 factors in the controlled clinical trial, *Biometrics* 31, 103—115  
507 Quittner, A. L., Saez-Flores, E., & Barton, J. D. (2016). The psychological burden of cystic fibrosis. *Current opinion in*  
508 *pulmonary medicine*, 22(2), 187-191.  
509 Reinauer, C., Viermann, R., Förtsch K., Linderskamp H., Warschburger P., Holl R.W., Staab D., Minden K., Muche R.,  
510 Domhardt M., Baumeister H., Meissner T. (2018). COACH consortium. Motivational Interviewing as a tool to enhance  
511 access to mental health treatment in adolescents with chronic medical conditions and need for psychological support  
512 (COACH-MI): study protocol for a cluster randomised controlled trial. *Trials*, 14;19(1):629.  
513 RITA (Randomization In Treatment Arms) Software, Vers. 1.31 (2013) Evidat - Statistical Apps + Consulting, Dr. Friedrich  
514 Pahlke / Lübeck  
515 Saulsberry, A., Marko-Holguin, M., Blomeke, K., Hinkle, C., Fogel, J., Gladstone, T., Van Voorhees, B. W. (2013).  
516 Randomized Clinical Trial of a Primary Care Internet-based Intervention to Prevent Adolescent Depression: One-year  
517 Outcomes. *Journal of the Canadian Academy of Child and Adolescent Psychiatry*, 22(2), 106-117.  
518 Spitzer, R. L., Kroenke, K., Williams, J. B., & Löwe, B. (2006). A brief measure for assessing generalized anxiety disorder:  
519 the GAD-7. *Archives of internal medicine*, 166(10), 1092-1097.  
520 Statistical Solutions. (2015). nQuery Advisor + nTerim 4.0 Users Guide. Cork, Ireland. Retrieved from  
521 <http://www.statsols.com/nquery-sample-size-calculator>  
522 Thompson, K., Kulkarni, J., & Sergejew, A. (2000). Reliability and validity of a new Medication Adherence Rating Scale  
523 (MARS) for the psychoses. *Schizophrenia research*, 42(3), 241-247.  
524 Tommelein E, Mehuys E, Van Tongelen I, Brusselle G, Boussery K. Accuracy of the Medication Adherence Report Scale  
525 (MARS-5) as a quantitative measure of adherence to inhalation medication in patients with COPD. *Ann Pharmacother*.  
526 2014 May;48(5):589-95.  
527 Van Voorhees, B. W., Fogel, J., Pomper, B. E., Marko, M., Reid, N., Watson, N., Domanico, R. (2009). Adolescent Dose and  
528 Ratings of an Internet-Based Depression Prevention Program: A Randomized Trial of Primary Care Physician Brief Advice  
529 versus a Motivational Interview. *Journal of cognitive and behavioral psychotherapies: the official journal of the*  
530 *International Institute for the Advanced Studies of Psychotherapy and Applied Mental Health*, 9(1), 1-19.

| Document          | Acronym  | Study registration ID      | Version                  |
|-------------------|----------|----------------------------|--------------------------|
| Study Description | COACH-MI | 2017114504 / DRKS 00014043 | 04/2018 // Addendum 2021 |
