# Supplementary material for: Efficacy of Motivational Interviewing to Improve Utilization of Mental Health Services Among Youths With Chronic Medical Conditions: A Cluster Randomized Clinical Trial
Source: PubMed Central journal article supplement (PMC8486984; doi:10.1001/jamanetworkopen.2021.27622), 2021-10-01
Supplement: jamanetwopen-e2127622-s002.pdf [file jamanetwopen-e2127622-s002.pdf]

## **Data Sharing Statement**

Reinauer C, Platzbecker AL, Viermann R, et al. Efficacy of Motivational Interviewing to Improve Utilization of Mental Health Services Among Youths With Chronic Medical Conditions. JAMA Netw Open. 2021;4(10):e2127622. doi:10.1001/jamanetworkopen.2021.27622

### **Data**

**Data available:** No

### **Additional Information**

**Explanation for why data not available:** Data generated during this study are not publicly available because the participants did not agree for their data to be shared publicly. Individual de-identified, anonymized data are available from the authors upon reasonable request (<https://www.coach.klips-ulm.de/>).
